# Supplementary material
Source: MDPI journal article supplement (https://www.mdpi.com/2073-4344/8/7/292)
Supplement: s1 [file s1]

# Supplemental Materials: A Characterization Study of Reactive Sites in ALD-Synthesized $\text{WO}_x/\text{ZrO}_2$ Catalysts

Cong Wang, Xinyu Mao, Jennifer D. Lee, Tzia Ming Onn, Yu-Hao Yeh, Christopher B. Murray and Raymond J. Gorte

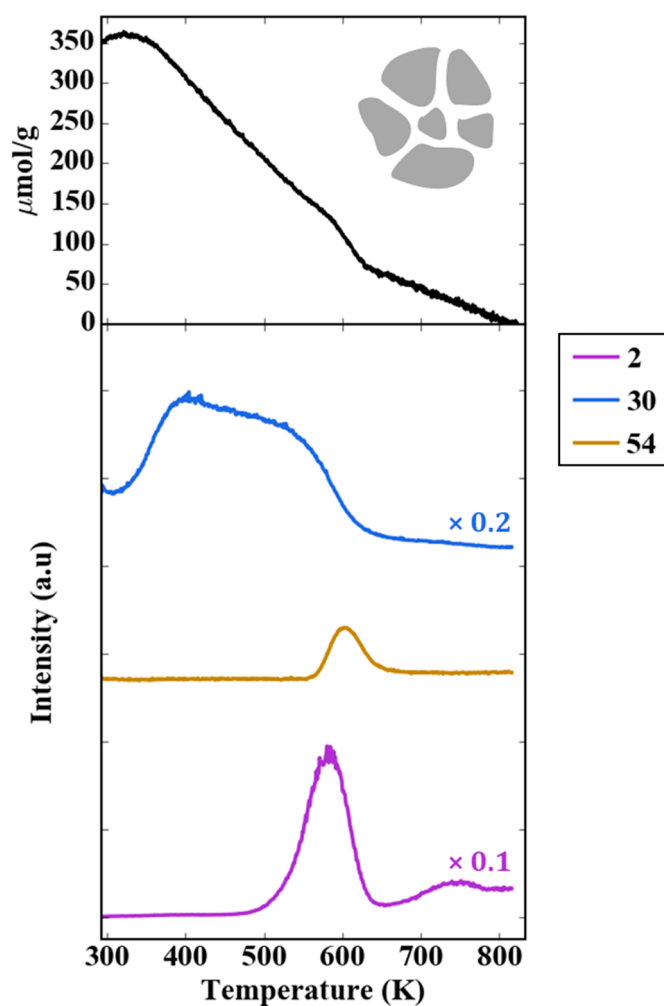

**Figure S1.** TPD-TGA of 1-propanamine over  $\text{ZrO}_2$ . The desorption features correspond to hydrogen ( $m/e = 2$ ), unreacted 1-propanamine ( $m/e = 30$ ) and propionitrile ( $m/e = 54$ ). The graphic symbols represent schematic  $\text{ZrO}_2$  support (gray).
